# Supplementary material for: Gardnerella vaginalis Subgroups Defined by cpn60 Sequencing and Sialidase Activity in Isolates from Canada, Belgium and Kenya
Source: PubMed Central journal article supplement (PMC4709144; doi:10.1371/journal.pone.0146510), 2016-01-11
Supplement: pone.0146510.s001.pdf [file pone.0146510.s001.pdf]

Hydrolysis probes

SYBR green

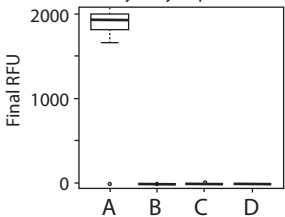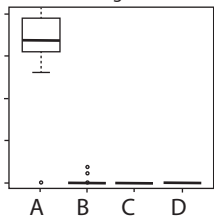

A

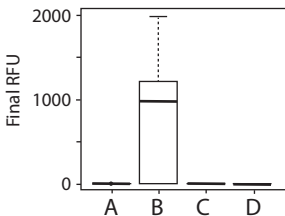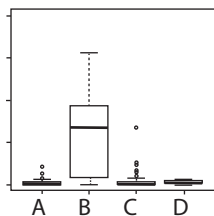

B

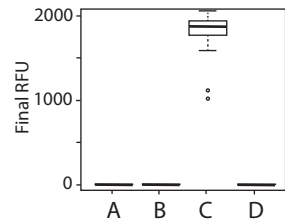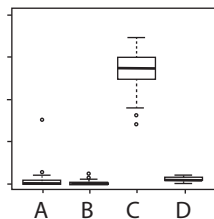

C

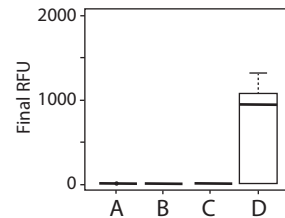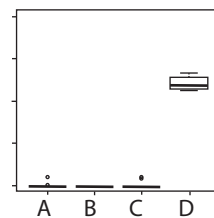

D
