# Supplementary material for: Gardnerella vaginalis Subgroups Defined by cpn60 Sequencing and Sialidase Activity in Isolates from Canada, Belgium and Kenya
Source: PubMed Central journal article supplement (PMC4709144; doi:10.1371/journal.pone.0146510), 2016-01-11

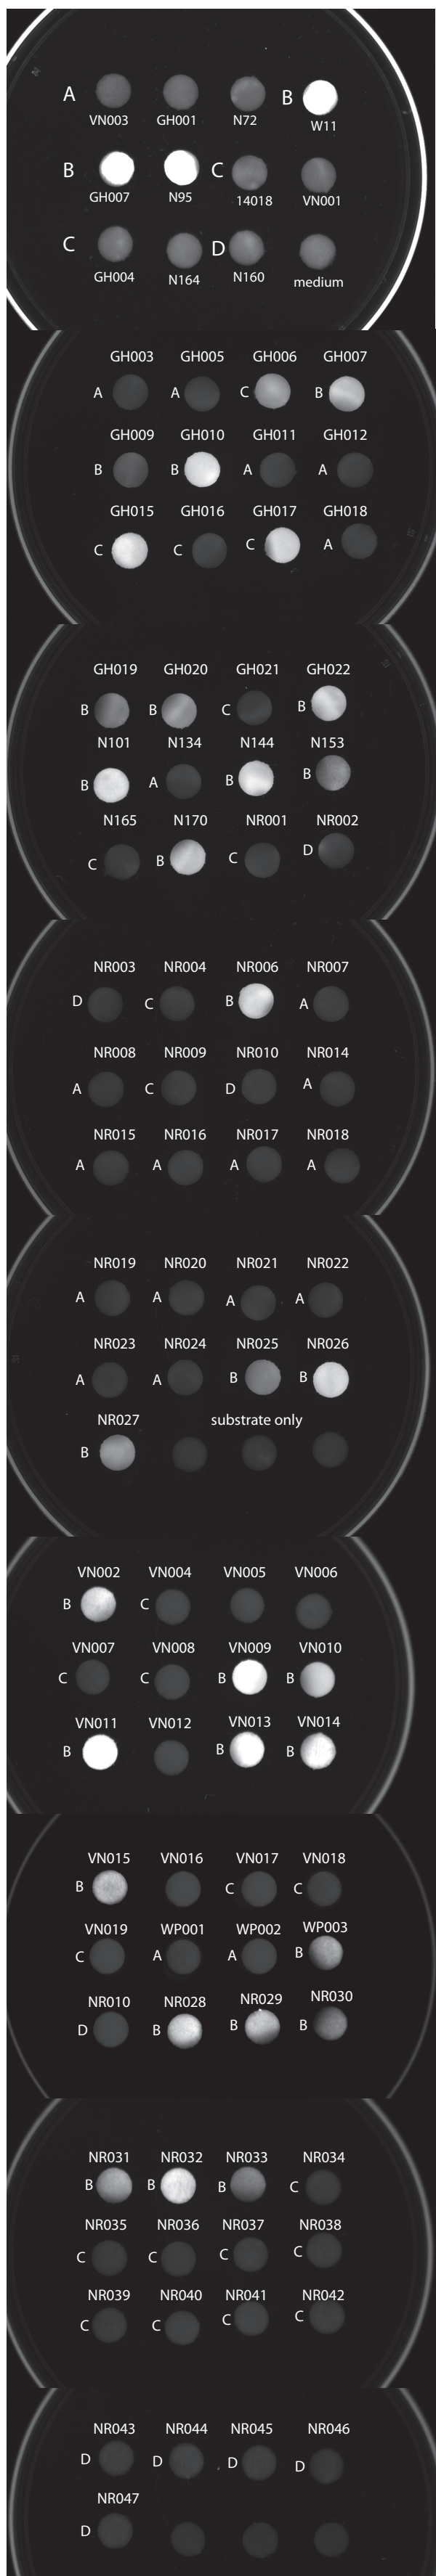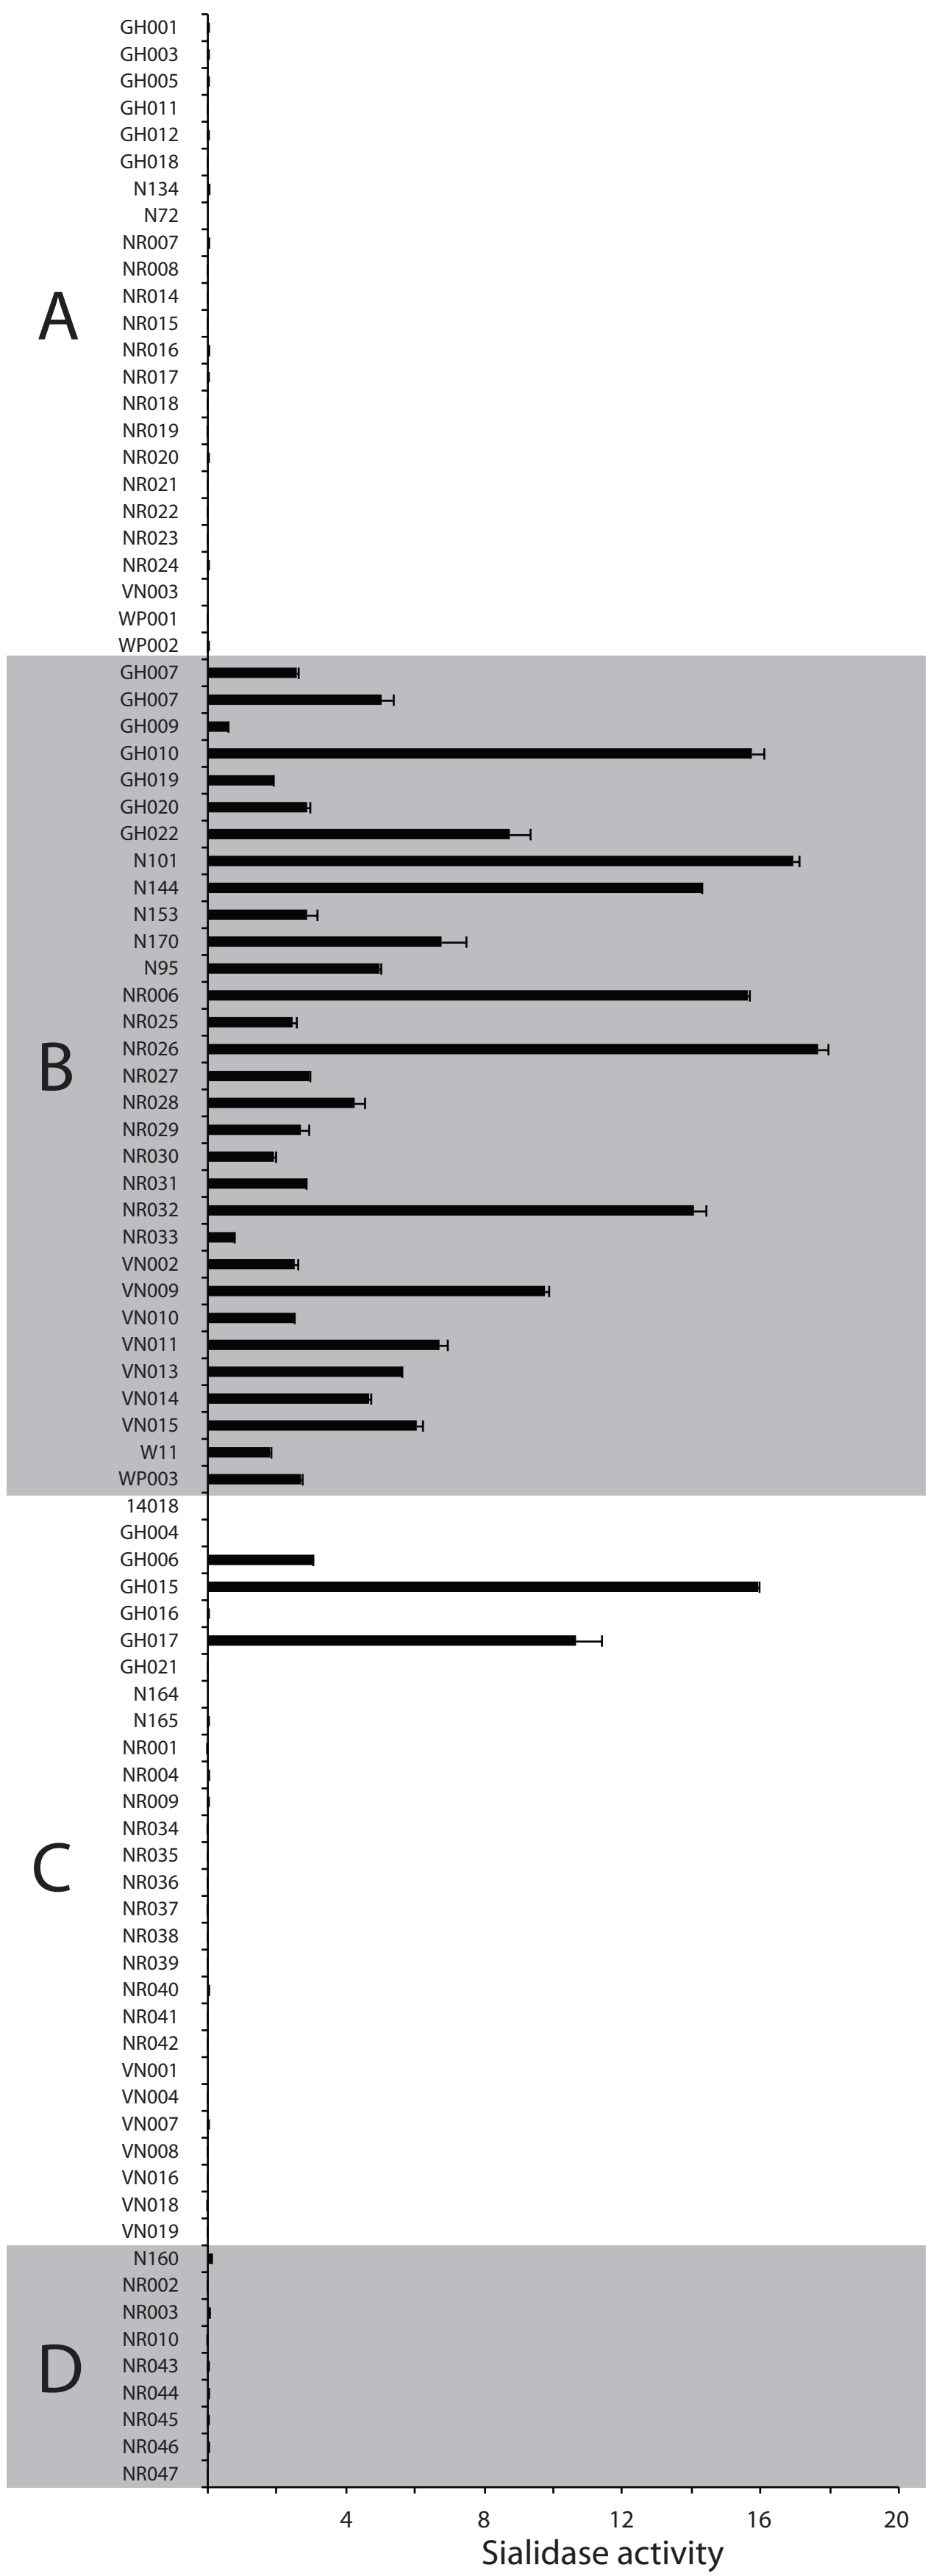

Supplement: pone.0146510.s002.pdf [file pone.0146510.s002.pdf]
