# Supplementary material for: Gardnerella vaginalis Subgroups Defined by cpn60 Sequencing and Sialidase Activity in Isolates from Canada, Belgium and Kenya
Source: PubMed Central journal article supplement (PMC4709144; doi:10.1371/journal.pone.0146510), 2016-01-11
Supplement: pone.0146510.s003.pdf [file pone.0146510.s003.pdf]

S1 Table. Primers and probes used in this study

| Purpose                  | Assay                            | Target strain | Length | Target                            | Protein ID       | Primer/Probe            | Sequence                           | Ref. |
|--------------------------|----------------------------------|---------------|--------|-----------------------------------|------------------|-------------------------|------------------------------------|------|
| Subgroup A detection     | Hydrolysis Probes                | 409-05        | 74     | chloride transporter              | WP_012914241     | Gv4_cic_S               | CCTACGCAAGCTCCAGACGAC              | [6]  |
|                          |                                  |               |        |                                   |                  | Gv4_cic_AS              | ACAAGTTGCACTCTTCGAGCTGG            |      |
|                          |                                  |               |        |                                   |                  | Gv4_cic_TM              | HEX-ACTCGGCTGAAGCACACCACCACT-BHQ1  |      |
|                          | SYBR Green                       | 409-05        | 139    | allantoate amidohydrolase         | WP_012914179     | Gv4_all_S               | CACGCTGGCACAACAATGATG              |      |
| Gv4_all_AS               |                                  |               |        |                                   |                  | TTGGAACACGCTGATTCTACCG  |                                    |      |
| Subgroup B detection     | Hydrolysis Probes                | 00703Bmash    | 124    | hypothetical protein              | EIK82797         | Gv2_hyp_S               | GCAAAGCAGACTGAGCGTATTAG            |      |
|                          |                                  |               |        |                                   |                  | Gv2_hyp_AS              | GTAATAATCAGGCTCCTCATCGC            |      |
|                          |                                  |               |        |                                   |                  | Gv2_hyp_TM              | HEX-CGCAGGCGCTCGCATAACAGTGCA-BHQ1  |      |
|                          | SYBR Green                       | 00703Bmash    | 137    | Cellulosome anchoring protein     | EIK82557         | Gv2_cel_S               | GCTTGGGGTTCATATGGTGATGG            |      |
| Gv2_cel_AS               |                                  |               |        |                                   |                  | TCTTTATCAGACACGCCCTTAGC |                                    |      |
| Subgroup C detection     | Hydrolysis Probes                | ATCC14019     | 139    | putative alpha-fucosidase         | YP_003985210     | Gv1_fuc1_S              | CCAGTCATAAGTTTGCGTTTTACC           |      |
|                          |                                  |               |        |                                   |                  | Gv1_fuc1_AS             | TGGCACTGGCAAAGTTTACAAC             |      |
|                          |                                  |               |        |                                   |                  | Gv1_fuc1_TM             | FAM-CTCGCCGCAAGCACCATCAAGCCA-BHQ1  |      |
|                          | SYBR Green                       | ATCC14019     | 108    | galactokinase                     | YP_003986287     | Gv1_galK_S              | TTCTAGATTATTCGCCGCCAAATC           |      |
| Gv1_galK_AS              |                                  |               |        |                                   |                  | TTGCGATGTGTTGAAGGTAATGC |                                    |      |
| Subgroup D detection     | Hydrolysis Probes                | 00703Dmash    | 142    | Thioredoxin                       | EIK84834         | Gv3_thi_S               | TTCTGCTTCTTCTGCTATTTGCTG           |      |
|                          |                                  |               |        |                                   |                  | Gv3_thi_AS              | TTCGTTGACTTTTGGGCAACATG            |      |
|                          |                                  |               |        |                                   |                  | Gv3_thi_TM              | FAM-CGGTCCGTGCCGTTTCATTTGGTCC-BHQ1 |      |
|                          | SYBR Green                       | 00703Dmash    | 149    | alpha-beta hydrolase fold protein | EIK85650         | Gv3_a-b_S               | TGATTACGCTCACGCTCTCG               |      |
| Gv3_a-b_AS               |                                  |               |        |                                   |                  | CGGCAACAGCTTAGGAAGAAG   |                                    |      |
| Sialidase gene detection | PCR                              | ATCC14019     | 703    | sialidase A                       | YP_003985295     | Sia1-F                  | ATGGAACGTCGTTCAACGAAG              | [9]  |
|                          |                                  |               |        |                                   |                  | Sia1-R                  | GATACGCGTTTTATGTCTCTTGC            |      |
|                          | SYBR Green                       | ATCC14019     | 163    | sialidase A                       | YP_003985295     | GVSI-F                  | GACGACGGCGAATGGCACGA               | [8]  |
|                          |                                  |               |        |                                   |                  | GVSI-R                  | AGTCGCACTCCGCGCAAGTC               |      |
| 16S rDNA-based typing    | PCR / restriction digest (ARDRA) | ATCC14019     | 1483   | 16S rRNA                          | Gene ID: 9903746 | GV10F                   | GGTTCGATTCTGGCTCAG                 | [8]  |
|                          |                                  |               |        |                                   |                  | GV10R                   | TACCTTGTTACGACTTCGTCCCA            |      |
