# Supplementary material for: Gardnerella vaginalis Subgroups Defined by cpn60 Sequencing and Sialidase Activity in Isolates from Canada, Belgium and Kenya
Source: PubMed Central journal article supplement (PMC4709144; doi:10.1371/journal.pone.0146510), 2016-01-11
Supplement: pone.0146510.s004.pdf [file pone.0146510.s004.pdf]

S2 Table. Phylogenetic and phenotypic characteristics of *Gardnerella vaginalis* isolates

| Strain | cpn60 subgroup | ARDRA pattern | Real-time PCR for subgroup detection <sup>1</sup> |   |   |   |                   |     |     |     | Sialidase gene presence and activity |                   |                   |                          |
|--------|----------------|---------------|---------------------------------------------------|---|---|---|-------------------|-----|-----|-----|--------------------------------------|-------------------|-------------------|--------------------------|
|        |                |               | Hydrolysis probe assays                           |   |   |   | SYBR green assays |     |     |     | PCR <sup>2</sup>                     | SYBR <sup>1</sup> | Spot <sup>3</sup> | Fluorometry <sup>4</sup> |
|        |                |               | A                                                 | B | C | D | A                 | B   | C   | D   |                                      |                   |                   |                          |
| GH001  | A              | 1             | 1829                                              | 0 | 0 | 6 | 1945              | 0   | 63  | 0   | 0                                    | 0                 | 0                 | 0                        |
| GH003  | A              | 1             | 2088                                              | 0 | 0 | 0 | 2088              | 20  | 81  | 0   | 0                                    | 17                | 0                 | 0                        |
| GH005  | A              | 1             | 1954                                              | 0 | 0 | 0 | 1954              | 211 | 107 | 0   | 0                                    | 0                 | 0                 | 0                        |
| GH011  | A              | 1             | 1936                                              | 0 | 0 | 0 | 1936              | 27  | 85  | 0   | 0                                    | 8                 | 0                 | 0                        |
| GH012  | A              | 1             | 2218                                              | 0 | 0 | 0 | 2218              | 0   | 133 | 0   | 0                                    | 0                 | 0                 | 0                        |
| GH018  | A              | 1             | 1764                                              | 0 | 0 | 0 | 1311              | 0   | 10  | 0   | 0                                    | 6                 | 0                 | 0                        |
| N115   | A              | 1             | 1487                                              | 0 | 0 | 0 | 0                 | 0   | 0   | 0   | 0                                    | 0                 | 0                 | 0                        |
| N134   | A              | 1             | 1768                                              | 0 | 0 | 0 | 1398              | 61  | 19  | 0   | 0                                    | 0                 | 0                 | 0                        |
| N72    | A              | 1             | 1660                                              | 0 | 0 | 0 | 1929              | 0   | 47  | 0   | 0                                    | 0                 | 0                 | 0                        |
| NR007  | A              | 1             | 1903                                              | 0 | 0 | 0 | 1903              | 0   | 26  | 0   | 0                                    | 0                 | 0                 | 0                        |
| NR008  | A              | 1             | 1970                                              | 0 | 0 | 0 | 1970              | 0   | 761 | 0   | 0                                    | 96                | 0                 | 0                        |
| NR010  | A              | 1             | 0                                                 | 0 | 0 | 0 | 0                 | 0   | 23  | 0   | 1                                    | 1055              | 0                 | 0                        |
| NR014  | A              | 1             | 1893                                              | 0 | 0 | 0 | 1893              | 71  | 7   | 22  | 0                                    | 0                 | 0                 | 0                        |
| NR015  | A              | 1             | 1811                                              | 0 | 0 | 0 | 0                 | 128 | 9   | 0   | 0                                    | 74                | 0                 | 0                        |
| NR016  | A              | 1             | 2037                                              | 0 | 0 | 0 | 1540              | 0   | 0   | 0   | 0                                    | 0                 | 0                 | 0                        |
| NR017  | A              | 1             | 1979                                              | 0 | 0 | 0 | 1979              | 0   | 0   | 0   | 0                                    | 0                 | 0                 | 0                        |
| NR019  | A              | 1             | 1948                                              | 0 | 0 | 0 | 1948              | 0   | 46  | 0   | 0                                    | 0                 | 0                 | 0                        |
| NR020  | A              | 1             | 1949                                              | 0 | 0 | 0 | 1949              | 20  | 35  | 0   | 0                                    | 15                | 0                 | 0                        |
| NR021  | A              | 1             | 2052                                              | 0 | 0 | 0 | 2052              | 12  | 11  | 0   | 0                                    | 0                 | 0                 | 0                        |
| NR022  | A              | 1             | 1823                                              | 0 | 0 | 0 | 1823              | 36  | 26  | 0   | 0                                    | 0                 | 0                 | 0                        |
| NR023  | A              | 1             | 1903                                              | 0 | 0 | 0 | 1570              | 36  | 0   | 0   | 0                                    | 0                 | 0                 | 0                        |
| NR024  | A              | 1             | 1977                                              | 0 | 0 | 0 | 1608              | 2   | 0   | 0   | 0                                    | 0                 | 0                 | 0                        |
| NR045  | A              | 1             | 1708                                              | 7 | 0 | 0 | 0                 | 40  | 82  | 98  | 0                                    | 50                | 0                 | 0                        |
| NR046  | A              | 1             | 1773                                              | 0 | 0 | 0 | 0                 | 0   | 12  | 0   | 0                                    | 0                 | 0                 | 0                        |
| VN003  | A              | 1             | 1779                                              | 0 | 0 | 0 | 2086              | 27  | 78  | 106 | 0                                    | 0                 | 0                 | 0                        |
| WP001  | A              | 1             | 1818                                              | 0 | 0 | 0 | 1572              | 0   | 0   | 0   | 0                                    | 0                 | 0                 | 0                        |
| WP002  | A              | 1             | 1923                                              | 0 | 0 | 0 | 1671              | 0   | 0   | 0   | 0                                    | 0                 | 0                 | 0                        |
| WP006  | A              | 1             | 1818                                              | 0 | 0 | 1 | 1485              | 0   | 0   | 0   | 0                                    | 0                 | 0                 | 0                        |
| WP011  | A              | 1             | 1910                                              | 0 | 0 | 0 | 1478              | 0   | 0   | 0   | 0                                    | 0                 | 0                 | 0                        |
| WP015  | A              | 1             | 2010                                              | 0 | 0 | 0 | 1570              | 0   | 0   | 0   | 0                                    | 0                 | 0                 | 0                        |

S2 Table. Phylogenetic and phenotypic characteristics of *Gardnerella vaginalis* isolates

| Strain | cpn60 subgroup | ARDRA pattern | Real-time PCR for subgroup detection <sup>1</sup> |      |   |   |                   |      |     |   | Sialidase gene presence and activity |                   |                   |                          |
|--------|----------------|---------------|---------------------------------------------------|------|---|---|-------------------|------|-----|---|--------------------------------------|-------------------|-------------------|--------------------------|
|        |                |               | Hydrolysis probe assays                           |      |   |   | SYBR green assays |      |     |   | PCR <sup>2</sup>                     | SYBR <sup>1</sup> | Spot <sup>3</sup> | Fluorometry <sup>4</sup> |
|        |                |               | A                                                 | B    | C | D | A                 | B    | C   | D |                                      |                   |                   |                          |
| WP016  | A              | 1             | 2080                                              | 0    | 0 | 0 | 1689              | 0    | 0   | 0 | 0                                    | 0                 | 0                 | 0                        |
| WP020  | A              | 1             | 2081                                              | 0    | 0 | 0 | 1719              | 0    | 0   | 0 | 0                                    | 0                 | 0                 | 0                        |
| WP021  | A              | 1             | 2015                                              | 0    | 0 | 0 | 1723              | 0    | 3   | 0 | 0                                    | 0                 | 0                 | 0                        |
| WP022  | A              | 1             | 1929                                              | 0    | 0 | 0 | 1587              | 0    | 0   | 0 | 0                                    | 0                 | 0                 | 0                        |
| WP024  | A              | 1             | 2094                                              | 0    | 0 | 0 | 1649              | 0    | 0   | 0 | 0                                    | 0                 | 0                 | 0                        |
| WP026  | A              | 1             | 2085                                              | 0    | 0 | 0 | 1687              | 0    | 0   | 0 | 0                                    | 0                 | 0                 | 0                        |
| GH007  | B              | 1             | 0                                                 | 1233 | 0 | 0 | 10                | 789  | 82  | 0 | 1                                    | 1163              | 1                 | 5.61                     |
| GH009  | B              | 1             | 0                                                 | 1191 | 0 | 0 | 3                 | 735  | 84  | 0 | 1                                    | 1935              | 1                 | 0.91                     |
| GH010  | B              | 1             | 0                                                 | 1151 | 0 | 0 | 0                 | 935  | 40  | 0 | 1                                    | 2138              | 1                 | 26.96                    |
| GH019  | B              | 1             | 0                                                 | 980  | 0 | 0 | 1                 | 795  | 38  | 0 | 1                                    | 1800              | 1                 | 2.15                     |
| GH020  | B              | 1             | 0                                                 | 1027 | 0 | 0 | 0                 | 857  | 4   | 0 | 1                                    | 2063              | 1                 | 3.67                     |
| GH022  | B              | 1             | 0                                                 | 920  | 0 | 0 | 0                 | 0    | 26  | 0 | 1                                    | 1755              | 1                 | 9.78                     |
| N101   | B              | 2             | 0                                                 | 0    | 0 | 0 | 0                 | 517  | 0   | 0 | 1                                    | 1734              | 1                 | 18.39                    |
| N117   | B              | 2             | 0                                                 | 1984 | 0 | 0 | 0                 | 1564 | 0   | 0 | 1                                    | 1190              | 1                 | 2.85                     |
| N144   | B              | 2             | 0                                                 | 975  | 0 | 0 | 0                 | 1104 | 0   | 0 | 1                                    | 1731              | 1                 | 21.23                    |
| N153   | B              | 2             | 0                                                 | 0    | 0 | 0 | 0                 | 135  | 0   | 0 | 1                                    | 1408              | 1                 | 2.38                     |
| N170   | B              | 1             | 0                                                 | 1900 | 0 | 0 | 0                 | 0    | 0   | 0 | 1                                    | 1627              | 1                 | 7.30                     |
| N95    | B              | 1             | 0                                                 | 0    | 0 | 0 | 0                 | 1155 | 32  | 0 | 1                                    | 1123              | 1                 | 8.00                     |
| NR006  | B              | 1             | 0                                                 | 0    | 0 | 0 | 184               | 677  | 62  | 0 | 1                                    | 1828              | 1                 | 16.29                    |
| NR025  | B              | 2             | 0                                                 | 0    | 0 | 0 | 0                 | 14   | 0   | 0 | 1                                    | 1123              | 1                 | 3.57                     |
| NR026  | B              | 1             | 0                                                 | 0    | 0 | 0 | 0                 | 701  | 0   | 0 | 1                                    | 1868              | 1                 | 21.27                    |
| NR027  | B              | 2             | 0                                                 | 0    | 0 | 0 | 0                 | 90   | 0   | 0 | 1                                    | 1143              | 1                 | 2.78                     |
| NR028  | B              | 1             | 1                                                 | 1524 | 0 | 0 | 0                 | 1027 | 0   | 0 | 1                                    | 1784              | 1                 | 5.02                     |
| NR029  | B              | 2             | 0                                                 | 0    | 0 | 0 | 0                 | 82   | 121 | 0 | 1                                    | 1213              | 1                 | 2.30                     |
| NR030  | B              | 1             | 0                                                 | 1368 | 0 | 0 | 0                 | 1024 | 0   | 0 | 1                                    | 1994              | 1                 | 1.97                     |
| NR031  | B              | 1             | 0                                                 | 0    | 0 | 0 | 0                 | 999  | 1   | 0 | 1                                    | 2013              | 1                 | 2.92                     |
| NR032  | B              | 1             | 0                                                 | 795  | 0 | 0 | 0                 | 1056 | 0   | 0 | 1                                    | 1795              | 1                 | 19.45                    |
| NR033  | B              | 1             | 0                                                 | 0    | 0 | 0 | 0                 | 93   | 0   | 0 | 1                                    | 1866              | 1                 | 1.11                     |
| VN002  | B              | 1             | 0                                                 | 1446 | 0 | 0 | 0                 | 0    | 28  | 0 | 1                                    | 2075              | 1                 | 2.80                     |
| VN009  | B              | 1             | 0                                                 | 1011 | 0 | 0 | 0                 | 883  | 0   | 0 | 1                                    | 1710              | 1                 | 7.68                     |

S2 Table. Phylogenetic and phenotypic characteristics of *Gardnerella vaginalis* isolates

| Strain | cpn60 subgroup | ARDRA pattern | Real-time PCR for subgroup detection <sup>1</sup> |      |      |   |                   |      |      |     | Sialidase gene presence and activity |                   |                   |                          |
|--------|----------------|---------------|---------------------------------------------------|------|------|---|-------------------|------|------|-----|--------------------------------------|-------------------|-------------------|--------------------------|
|        |                |               | Hydrolysis probe assays                           |      |      |   | SYBR green assays |      |      |     | PCR <sup>2</sup>                     | SYBR <sup>1</sup> | Spot <sup>3</sup> | Fluorometry <sup>4</sup> |
|        |                |               | A                                                 | B    | C    | D | A                 | B    | C    | D   |                                      |                   |                   |                          |
| VN010  | B              | 1             | 0                                                 | 1095 | 0    | 0 | 0                 | 830  | 14   | 0   | 1                                    | 1615              | 1                 | 2.80                     |
| VN011  | B              | 1             | 0                                                 | 1356 | 0    | 0 | 0                 | 75   | 0    | 0   | 1                                    | 1856              | 1                 | 6.85                     |
| VN013  | B              | 1             | 0                                                 | 949  | 0    | 0 | 0                 | 168  | 0    | 0   | 1                                    | 1831              | 1                 | 4.98                     |
| VN014  | B              | 1             | 0                                                 | 1185 | 0    | 0 | 0                 | 260  | 0    | 0   | 1                                    | 1817              | 1                 | 4.38                     |
| VN015  | B              | 1             | 0                                                 | 935  | 0    | 0 | 0                 | 184  | 19   | 0   | 1                                    | 1734              | 1                 | 5.58                     |
| W11    | B              | 1             | 0                                                 | 1442 | 0    | 0 | 0                 | 1032 | 10   | 0   | 1                                    | 1025              | 1                 | 4.57                     |
| WP003  | B              | 2             | 0                                                 | 1151 | 0    | 0 | 0                 | 1527 | 0    | 0   | 1                                    | 1142              | 1                 | 2.57                     |
| WP027  | B              | 2             | 0                                                 | 1045 | 0    | 0 | 103               | 0    | 0    | 0   | 1                                    | 1127              | 1                 | 3.14                     |
| WP028  | B              | 1             | 0                                                 | 1475 | 0    | 0 | 0                 | 748  | 0    | 0   | 1                                    | 1442              | 1                 | 2.23                     |
| GH004  | C              | 2             | 0                                                 | 0    | 1661 | 0 | 0                 | 17   | 813  | 0   | 1                                    | 1142              | 0                 | 0.00                     |
| GH006  | C              | 2             | 0                                                 | 0    | 1878 | 0 | 0                 | 0    | 1422 | 0   | 1                                    | 1361              | 1                 | 2.97                     |
| GH015  | C              | 2             | 0                                                 | 0    | 2047 | 0 | 0                 | 0    | 1332 | 86  | 1                                    | 1441              | 1                 | 26.60                    |
| GH016  | C              | 2             | 0                                                 | 0    | 2034 | 0 | 0                 | 0    | 1380 | 0   | 1                                    | 1220              | 0                 | 0.00                     |
| GH017  | C              | 2             | 0                                                 | 0    | 1784 | 0 | 0                 | 0    | 1467 | 0   | 1                                    | 1670              | 1                 | 10.83                    |
| GH021  | C              | 2             | 0                                                 | 0    | 1934 | 0 | 0                 | 0    | 1136 | 0   | 1                                    | 1471              | 0                 | 0.00                     |
| N165   | C              | 2             | 0                                                 | 0    | 1012 | 0 | 0                 | 0    | 1119 | 0   | 1                                    | 1157              | 0                 | 0.00                     |
| NR001  | C              | 2             | 0                                                 | 0    | 1877 | 0 | 0                 | 0    | 1339 | 0   | 1                                    | 1709              | 0                 | 0.00                     |
| NR004  | C              | 2             | 1                                                 | 0    | 1999 | 0 | 0                 | 0    | 1485 | 0   | 1                                    | 1906              | 0                 | 0.00                     |
| NR009  | C              | 2             | 0                                                 | 0    | 1989 | 0 | 0                 | 0    | 1346 | 0   | 1                                    | 1781              | 0                 | 0.00                     |
| NR034  | C              | 2             | 0                                                 | 0    | 1875 | 0 | 0                 | 0    | 1194 | 0   | 1                                    | 1966              | 0                 | 0.00                     |
| NR035  | C              | 2             | 0                                                 | 0    | 1864 | 0 | 0                 | 253  | 1499 | 0   | 1                                    | 1875              | 0                 | 0.00                     |
| NR036  | C              | 2             | 1                                                 | 0    | 1899 | 0 | 0                 | 165  | 1387 | 107 | 1                                    | 1975              | 0                 | 0.00                     |
| NR037  | C              | 2             | 0                                                 | 0    | 1783 | 0 | 0                 | 0    | 1594 | 0   | 1                                    | 2190              | 0                 | 0.00                     |
| NR038  | C              | 2             | 0                                                 | 0    | 1679 | 0 | 0                 | 76   | 1481 | 0   | 1                                    | 2050              | 0                 | 0.00                     |
| NR039  | C              | 2             | 0                                                 | 0    | 1781 | 0 | 0                 | 99   | 1547 | 0   | 1                                    | 2041              | 0                 | 0.00                     |
| NR040  | C              | 2             | 1                                                 | 0    | 1757 | 0 | 0                 | 32   | 1542 | 0   | 1                                    | 1751              | 0                 | 0.00                     |
| NR041  | C              | 2             | 0                                                 | 0    | 1874 | 0 | 0                 | 232  | 1670 | 0   | 1                                    | 2048              | 0                 | 0.00                     |
| NR042  | C              | 2             | 0                                                 | 0    | 1934 | 0 | 0                 | 53   | 1532 | 0   | 1                                    | 1981              | 0                 | 0.00                     |
| VN001  | C              | 2             | 0                                                 | 0    | 1579 | 0 | 0                 | 143  | 1282 | 0   | 1                                    | 1196              | 0                 | 0.00                     |
| VN004  | C              | 2             | 0                                                 | 0    | 1635 | 0 | 0                 | 0    | 1534 | 0   | 1                                    | 1862              | 0                 | 0.00                     |

S2 Table. Phylogenetic and phenotypic characteristics of *Gardnerella vaginalis* isolates

| Strain | cpn60 subgroup | ARDRA pattern | Real-time PCR for subgroup detection <sup>1</sup> |   |      |      |                   |     |      |      | Sialidase gene presence and activity |                   |                   |                          |
|--------|----------------|---------------|---------------------------------------------------|---|------|------|-------------------|-----|------|------|--------------------------------------|-------------------|-------------------|--------------------------|
|        |                |               | Hydrolysis probe assays                           |   |      |      | SYBR green assays |     |      |      | PCR <sup>2</sup>                     | SYBR <sup>1</sup> | Spot <sup>3</sup> | Fluorometry <sup>4</sup> |
|        |                |               | A                                                 | B | C    | D    | A                 | B   | C    | D    |                                      |                   |                   |                          |
| VN007  | C              | 2             | 0                                                 | 0 | 1798 | 0    | 0                 | 41  | 1738 | 0    | 1                                    | 1422              | 0                 | 0.00                     |
| VN008  | C              | 2             | 0                                                 | 0 | 1761 | 0    | 0                 | 145 | 1669 | 0    | 1                                    | 1607              | 0                 | 0.00                     |
| VN016  | C              | 2             | 0                                                 | 0 | 1878 | 0    | 0                 | 0   | 952  | 0    | 1                                    | 1115              | 0                 | 0.00                     |
| VN018  | C              | 2             | 0                                                 | 0 | 1831 | 0    | 0                 | 0   | 1102 | 0    | 1                                    | 1450              | 0                 | 0.00                     |
| VN019  | C              | 2             | 0                                                 | 0 | 1772 | 0    | 0                 | 0   | 1302 | 0    | 1                                    | 1192              | 0                 | 0.00                     |
| WP007  | C              | 2             | 1                                                 | 0 | 1770 | 0    | 0                 | 0   | 1234 | 0    | 1                                    | 1307              | 0                 | 0.00                     |
| WP008  | C              | 2             | 0                                                 | 0 | 1978 | 0    | 0                 | 0   | 1407 | 0    | 1                                    | 1451              | 0                 | 0.00                     |
| WP009  | C              | 2             | 1                                                 | 0 | 1945 | 0    | 0                 | 0   | 1252 | 0    | 1                                    | 1454              | 0                 | 0.00                     |
| WP010  | C              | 2             | 0                                                 | 0 | 1922 | 0    | 0                 | 0   | 1287 | 0    | 1                                    | 1467              | 0                 | 0.00                     |
| WP014  | C              | 2             | 0                                                 | 0 | 1765 | 0    | 0                 | 0   | 1293 | 0    | 1                                    | 1463              | 0                 | 0.00                     |
| WP018  | C              | 2             | 1                                                 | 0 | 1958 | 0    | 0                 | 0   | 1430 | 0    | 1                                    | 1496              | 0                 | 0.00                     |
| WP019  | C              | 2             | 1                                                 | 0 | 2060 | 0    | 0                 | 0   | 1239 | 0    | 1                                    | 1358              | 0                 | 0.00                     |
| WP023  | C              | 2             | 1                                                 | 0 | 2041 | 0    | 0                 | 0   | 1310 | 0    | 1                                    | 1399              | 0                 | 0.00                     |
| WP025  | C              | 2             | 29                                                | 0 | 1122 | 0    | 0                 | 0   | 1314 | 0    | 1                                    | 1455              | 0                 | 0.00                     |
| N160   | D              | 1             | 0                                                 | 0 | 0    | 1115 | 0                 | 0   | 0    | 1272 | 1                                    | 569               | 0                 | 0.00                     |
| N161   | D              | 1             | 0                                                 | 0 | 0    | 1166 | 0                 | 0   | 0    | 1290 | 1                                    | 659               | 0                 | 0.00                     |
| NR002  | D              | 2             | 0                                                 | 0 | 0    | 0    | 0                 | 0   | 58   | 1171 | 1                                    | 1442              | 0                 | 0.00                     |
| NR003  | D              | 1             | 0                                                 | 0 | 0    | 1316 | 0                 | 35  | 55   | 1354 | 1                                    | 702               | 0                 | 0.00                     |
| NR043  | D              | 1             | 0                                                 | 0 | 0    | 1074 | 0                 | 402 | 109  | 1217 | 1                                    | 992               | 0                 | 0.00                     |
| NR044  | D              | 1             | 0                                                 | 0 | 0    | 961  | 0                 | 0   | 0    | 1652 | 1                                    | 458               | 0                 | 0.00                     |
| NR047  | D              | 2             | 0                                                 | 0 | 0    | 0    | 0                 | 16  | 9    | 1140 | 1                                    | 1535              | 0                 | 0.00                     |
| WP012  | D              | 2             | 0                                                 | 0 | 0    | 1083 | 0                 | 0   | 0    | 1680 | 1                                    | 853               | 0                 | 0.00                     |

<sup>1</sup> Values are mean relative fluorescent units minus standard deviation of last 10 PCR cycles, all negative values adjusted to 0.

<sup>2</sup> Presence of band in Sia-F/R PCR assay, 0=Negative, 1=Positive

<sup>3</sup> Visible fluorescence of culture in presence of substrate on filter paper spots under UV light, 0=Negative, 1=Positive

<sup>4</sup> Values are change (slope) of fluorescence over time of cultures in presence of substrate measured on a FLx800 fluorometer, adjusted to 0.1 OD<sub>595</sub>
